# Supplementary material
Source: HighWire-hosted journal article supplement (https://bjo.bmj.com/content/107/6/802)
Supplement: inline-supplementary-material-3 [file inline-supplementary-material-3.pdf]

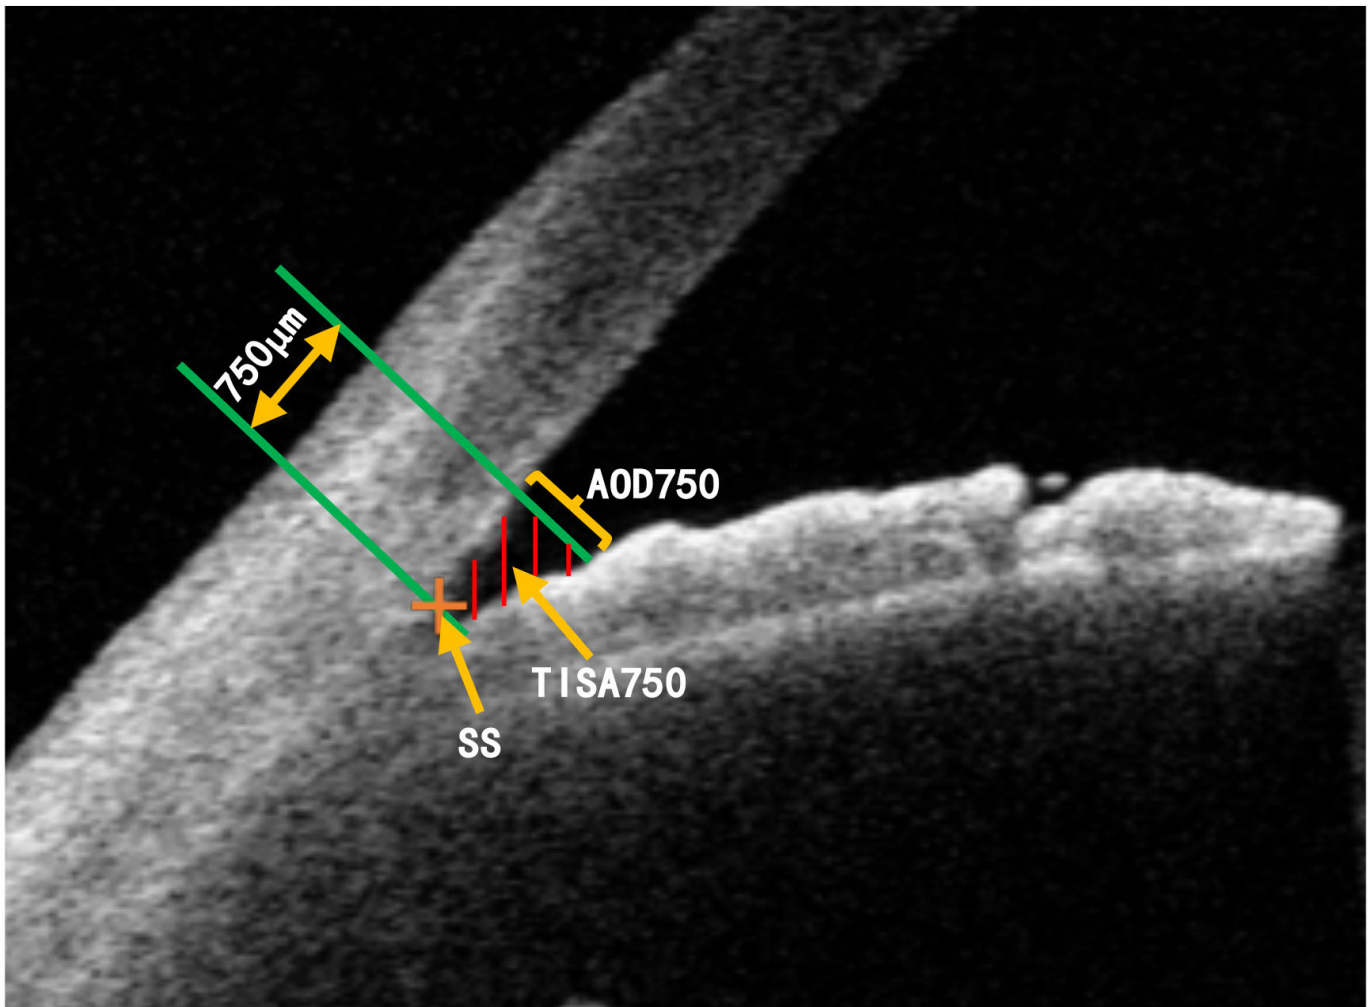

**Supplemental Figure 3** Illustration of AOD and TISA on AS-OCT image. AOD = angle opening distance; TISA = trabecular iris space area; SS= scleral spur.
