# Supplementary material
Source: HighWire-hosted journal article supplement (https://bjo.bmj.com/content/107/6/802)
Supplement: inline-supplementary-material-5 [file inline-supplementary-material-5.pdf]

**Supplemental Material 2** The full version results of 36 angles.

We summarized the full version results of 36 angles in the **Supplemental material: tables 1,2,3,4**.

**Supplemental material: table 1** Scleral spur location difference between DLLSS and MPSS in DARK1 dataset, full version of 36 angles.

| Angle | ED All<br>(mean $\pm$ SD $\mu$ m)<br>(N=287) | ED Normal<br>(mean $\pm$ SD $\mu$ m)<br>(N=116) | ED PACD<br>(mean $\pm$ SD $\mu$ m)<br>(N=171) |
|-------|----------------------------------------------|-------------------------------------------------|-----------------------------------------------|
| Mean  | 77.39 $\pm$ 26.94                            | 66.50 $\pm$ 20.45                               | 84.78 $\pm$ 28.33                             |
| 0°    | 63.91 $\pm$ 47.90                            | 53.21 $\pm$ 33.34                               | 71.17 $\pm$ 54.56                             |
| 10°   | 60.82 $\pm$ 45.83                            | 55.79 $\pm$ 41.02                               | 64.24 $\pm$ 48.64                             |
| 20°   | 66.75 $\pm$ 49.73                            | 65.80 $\pm$ 49.41                               | 67.39 $\pm$ 50.08                             |
| 30°   | 81.11 $\pm$ 58.22                            | 74.10 $\pm$ 54.73                               | 85.87 $\pm$ 60.17                             |
| 40°   | 77.28 $\pm$ 61.72                            | 63.13 $\pm$ 47.63                               | 86.88 $\pm$ 68.15                             |
| 50°   | 86.66 $\pm$ 77.48                            | 80.55 $\pm$ 73.46                               | 90.81 $\pm$ 80.05                             |
| 60°   | 98.60 $\pm$ 102.51                           | 78.39 $\pm$ 59.37                               | 112.31 $\pm$ 121.76                           |
| 70°   | 95.67 $\pm$ 79.33                            | 87.12 $\pm$ 77.88                               | 101.48 $\pm$ 80.00                            |
| 80°   | 85.69 $\pm$ 76.95                            | 74.81 $\pm$ 74.35                               | 93.07 $\pm$ 78.02                             |
| 90°   | 98.73 $\pm$ 85.95                            | 84.99 $\pm$ 76.93                               | 108.05 $\pm$ 90.61                            |
| 100°  | 84.57 $\pm$ 78.99                            | 65.41 $\pm$ 64.44                               | 97.58 $\pm$ 85.25                             |
| 110°  | 85.97 $\pm$ 69.01                            | 71.70 $\pm$ 57.26                               | 95.65 $\pm$ 74.57                             |
| 120°  | 80.44 $\pm$ 67.71                            | 67.72 $\pm$ 52.13                               | 89.06 $\pm$ 75.43                             |
| 130°  | 78.87 $\pm$ 67.87                            | 70.70 $\pm$ 51.33                               | 84.41 $\pm$ 76.75                             |
| 140°  | 77.27 $\pm$ 63.22                            | 65.15 $\pm$ 47.74                               | 85.49 $\pm$ 70.82                             |
| 150°  | 69.66 $\pm$ 51.67                            | 63.10 $\pm$ 42.04                               | 74.11 $\pm$ 56.98                             |
| 160°  | 59.06 $\pm$ 46.35                            | 49.16 $\pm$ 37.36                               | 65.78 $\pm$ 50.57                             |
| 170°  | 63.05 $\pm$ 48.47                            | 55.98 $\pm$ 44.26                               | 67.85 $\pm$ 50.69                             |
| 180°  | 63.73 $\pm$ 50.01                            | 56.96 $\pm$ 42.88                               | 68.32 $\pm$ 53.95                             |
| 190°  | 58.05 $\pm$ 43.46                            | 53.76 $\pm$ 31.44                               | 60.96 $\pm$ 49.88                             |
| 200°  | 62.46 $\pm$ 47.37                            | 59.20 $\pm$ 44.08                               | 64.67 $\pm$ 49.49                             |
| 210°  | 70.23 $\pm$ 56.47                            | 54.87 $\pm$ 38.04                               | 80.64 $\pm$ 64.15                             |
| 220°  | 74.14 $\pm$ 64.16                            | 74.61 $\pm$ 68.55                               | 73.82 $\pm$ 61.20                             |
| 230°  | 83.77 $\pm$ 72.10                            | 66.50 $\pm$ 54.47                               | 95.48 $\pm$ 79.98                             |
| 240°  | 84.07 $\pm$ 62.41                            | 70.70 $\pm$ 50.69                               | 93.14 $\pm$ 67.90                             |
| 250°  | 96.05 $\pm$ 89.77                            | 86.36 $\pm$ 96.94                               | 102.63 $\pm$ 84.22                            |
| 260°  | 88.84 $\pm$ 72.60                            | 70.39 $\pm$ 43.58                               | 101.36 $\pm$ 84.80                            |
| 270°  | 91.33 $\pm$ 80.59                            | 67.64 $\pm$ 52.46                               | 107.40 $\pm$ 91.77                            |
| 280°  | 89.39 $\pm$ 80.04                            | 69.99 $\pm$ 58.76                               | 102.55 $\pm$ 89.51                            |
| 290°  | 93.16 $\pm$ 87.74                            | 75.04 $\pm$ 85.84                               | 105.45 $\pm$ 87.12                            |
| 300°  | 78.74 $\pm$ 63.63                            | 59.70 $\pm$ 46.56                               | 91.66 $\pm$ 70.22                             |
| 310°  | 75.43 $\pm$ 58.47                            | 70.67 $\pm$ 47.68                               | 78.67 $\pm$ 64.72                             |

|             |               |               |               |
|-------------|---------------|---------------|---------------|
| <b>320°</b> | 73.30 ± 61.50 | 59.02 ± 41.28 | 82.99 ± 70.55 |
| <b>330°</b> | 66.81 ± 57.52 | 58.55 ± 40.44 | 72.42 ± 66.19 |
| <b>340°</b> | 60.17 ± 44.47 | 57.94 ± 38.54 | 61.69 ± 48.13 |
| <b>350°</b> | 62.30 ± 47.02 | 55.27 ± 36.13 | 67.06 ± 52.72 |

ED = Euclidean distance; SD = standard deviation; N = number of subjects; DLLSS = deep learning located scleral spur; MPSS = manual plotted scleral spur; PACD = primary angle-closure disease.

**Supplemental material: table 2** Comparisons of parameters (mean ± SD) between DLLSS-based and MPSS-based in Dark1 dataset, full version of 36 angles.

| AOD750 (mm) |               |               |                     |               |               |                     |
|-------------|---------------|---------------|---------------------|---------------|---------------|---------------------|
| Angles      | Normal        |               |                     | PACD          |               |                     |
|             | DLLSS         | MPSS          | PValue <sup>a</sup> | DLLSS         | MPSS          | PValue <sup>a</sup> |
| <b>Mean</b> | 0.390 ± 0.201 | 0.385 ± 0.193 | 0.005               | 0.129 ± 0.077 | 0.129 ± 0.079 | 0.968               |
| <b>0°</b>   | 0.434 ± 0.250 | 0.433 ± 0.242 | 0.803               | 0.150 ± 0.091 | 0.148 ± 0.093 | 0.297               |
| <b>10°</b>  | 0.396 ± 0.202 | 0.394 ± 0.207 | 0.624               | 0.141 ± 0.087 | 0.139 ± 0.092 | 0.412               |
| <b>20°</b>  | 0.392 ± 0.219 | 0.385 ± 0.206 | 0.141               | 0.127 ± 0.089 | 0.129 ± 0.088 | 0.378               |
| <b>30°</b>  | 0.379 ± 0.205 | 0.379 ± 0.201 | 0.980               | 0.112 ± 0.083 | 0.112 ± 0.086 | 0.959               |
| <b>40°</b>  | 0.359 ± 0.203 | 0.355 ± 0.196 | 0.262               | 0.106 ± 0.078 | 0.109 ± 0.083 | 0.167               |
| <b>50°</b>  | 0.349 ± 0.200 | 0.346 ± 0.196 | 0.525               | 0.098 ± 0.075 | 0.096 ± 0.079 | 0.483               |
| <b>60°</b>  | 0.340 ± 0.211 | 0.343 ± 0.200 | 0.624               | 0.098 ± 0.082 | 0.102 ± 0.079 | 0.312               |
| <b>70°</b>  | 0.343 ± 0.205 | 0.341 ± 0.204 | 0.837               | 0.100 ± 0.078 | 0.101 ± 0.079 | 0.709               |
| <b>80°</b>  | 0.339 ± 0.199 | 0.333 ± 0.193 | 0.175               | 0.106 ± 0.080 | 0.102 ± 0.078 | 0.128               |
| <b>90°</b>  | 0.334 ± 0.198 | 0.318 ± 0.196 | 0.008               | 0.103 ± 0.079 | 0.098 ± 0.082 | 0.095               |
| <b>100°</b> | 0.322 ± 0.188 | 0.315 ± 0.188 | 0.149               | 0.094 ± 0.077 | 0.091 ± 0.080 | 0.324               |
| <b>110°</b> | 0.317 ± 0.188 | 0.318 ± 0.190 | 0.941               | 0.088 ± 0.078 | 0.086 ± 0.079 | 0.496               |
| <b>120°</b> | 0.327 ± 0.194 | 0.318 ± 0.193 | 0.023               | 0.086 ± 0.075 | 0.085 ± 0.078 | 0.688               |
| <b>130°</b> | 0.321 ± 0.187 | 0.310 ± 0.183 | 0.012               | 0.084 ± 0.076 | 0.081 ± 0.075 | 0.273               |
| <b>140°</b> | 0.326 ± 0.186 | 0.321 ± 0.191 | 0.320               | 0.093 ± 0.080 | 0.090 ± 0.080 | 0.130               |
| <b>150°</b> | 0.341 ± 0.200 | 0.333 ± 0.193 | 0.023               | 0.098 ± 0.083 | 0.095 ± 0.080 | 0.193               |
| <b>160°</b> | 0.367 ± 0.206 | 0.367 ± 0.212 | 0.860               | 0.113 ± 0.085 | 0.109 ± 0.088 | 0.114               |
| <b>170°</b> | 0.378 ± 0.195 | 0.383 ± 0.201 | 0.176               | 0.130 ± 0.096 | 0.127 ± 0.097 | 0.311               |
| <b>180°</b> | 0.419 ± 0.206 | 0.409 ± 0.196 | 0.004               | 0.143 ± 0.100 | 0.140 ± 0.104 | 0.164               |
| <b>190°</b> | 0.457 ± 0.228 | 0.441 ± 0.217 | <0.001              | 0.163 ± 0.106 | 0.160 ± 0.107 | 0.269               |
| <b>200°</b> | 0.464 ± 0.208 | 0.458 ± 0.208 | 0.151               | 0.174 ± 0.114 | 0.174 ± 0.115 | 0.754               |
| <b>210°</b> | 0.467 ± 0.243 | 0.455 ± 0.232 | 0.003               | 0.166 ± 0.109 | 0.170 ± 0.111 | 0.245               |
| <b>220°</b> | 0.442 ± 0.221 | 0.434 ± 0.213 | 0.107               | 0.162 ± 0.105 | 0.164 ± 0.110 | 0.346               |
| <b>230°</b> | 0.409 ± 0.213 | 0.400 ± 0.192 | 0.148               | 0.141 ± 0.099 | 0.144 ± 0.102 | 0.228               |
| <b>240°</b> | 0.381 ± 0.205 | 0.375 ± 0.185 | 0.308               | 0.124 ± 0.104 | 0.128 ± 0.104 | 0.229               |
| <b>250°</b> | 0.389 ± 0.205 | 0.375 ± 0.197 | 0.013               | 0.115 ± 0.097 | 0.119 ± 0.104 | 0.271               |
| <b>260°</b> | 0.387 ± 0.225 | 0.386 ± 0.216 | 0.764               | 0.127 ± 0.107 | 0.125 ± 0.105 | 0.566               |

|                                 |               |               |                           |               |               |                           |
|---------------------------------|---------------|---------------|---------------------------|---------------|---------------|---------------------------|
| 270°                            | 0.388 ± 0.233 | 0.385 ± 0.228 | 0.498                     | 0.124 ± 0.103 | 0.116 ± 0.105 | 0.018                     |
| 280°                            | 0.391 ± 0.217 | 0.394 ± 0.212 | 0.605                     | 0.122 ± 0.100 | 0.127 ± 0.104 | 0.156                     |
| 290°                            | 0.404 ± 0.235 | 0.392 ± 0.213 | 0.030                     | 0.132 ± 0.099 | 0.135 ± 0.101 | 0.224                     |
| 300°                            | 0.417 ± 0.226 | 0.414 ± 0.204 | 0.601                     | 0.145 ± 0.097 | 0.152 ± 0.103 | 0.014                     |
| 310°                            | 0.438 ± 0.239 | 0.436 ± 0.227 | 0.687                     | 0.164 ± 0.095 | 0.164 ± 0.100 | 0.944                     |
| 320°                            | 0.447 ± 0.219 | 0.437 ± 0.214 | 0.043                     | 0.172 ± 0.102 | 0.176 ± 0.102 | 0.082                     |
| 330°                            | 0.464 ± 0.238 | 0.461 ± 0.230 | 0.406                     | 0.177 ± 0.101 | 0.184 ± 0.109 | 0.019                     |
| 340°                            | 0.459 ± 0.233 | 0.454 ± 0.230 | 0.263                     | 0.177 ± 0.095 | 0.178 ± 0.098 | 0.421                     |
| 350°                            | 0.456 ± 0.253 | 0.452 ± 0.244 | 0.263                     | 0.169 ± 0.091 | 0.167 ± 0.097 | 0.548                     |
| <b>TISA750 (mm<sup>2</sup>)</b> |               |               |                           |               |               |                           |
| <b>Angles</b>                   | <b>Normal</b> |               |                           | <b>PACD</b>   |               |                           |
|                                 | <b>DLSS</b>   | <b>MPSS</b>   | <b>PValue<sup>a</sup></b> | <b>DLSS</b>   | <b>MPSS</b>   | <b>PValue<sup>a</sup></b> |
| <b>Mean</b>                     | 0.177 ± 0.090 | 0.176 ± 0.087 | 0.161                     | 0.055 ± 0.038 | 0.056 ± 0.039 | <0.001                    |
| <b>0°</b>                       | 0.205 ± 0.115 | 0.203 ± 0.109 | 0.542                     | 0.075 ± 0.056 | 0.076 ± 0.057 | 0.394                     |
| <b>10°</b>                      | 0.189 ± 0.095 | 0.189 ± 0.096 | 0.940                     | 0.073 ± 0.057 | 0.073 ± 0.057 | 0.964                     |
| <b>20°</b>                      | 0.187 ± 0.100 | 0.182 ± 0.091 | 0.081                     | 0.062 ± 0.054 | 0.062 ± 0.053 | 0.519                     |
| <b>30°</b>                      | 0.175 ± 0.094 | 0.176 ± 0.094 | 0.703                     | 0.049 ± 0.049 | 0.051 ± 0.049 | 0.056                     |
| <b>40°</b>                      | 0.165 ± 0.096 | 0.163 ± 0.095 | 0.555                     | 0.044 ± 0.043 | 0.047 ± 0.044 | 0.007                     |
| <b>50°</b>                      | 0.155 ± 0.093 | 0.153 ± 0.088 | 0.520                     | 0.037 ± 0.038 | 0.038 ± 0.039 | 0.241                     |
| <b>60°</b>                      | 0.142 ± 0.094 | 0.147 ± 0.093 | 0.084                     | 0.034 ± 0.038 | 0.035 ± 0.037 | 0.217                     |
| <b>70°</b>                      | 0.144 ± 0.091 | 0.143 ± 0.091 | 0.963                     | 0.034 ± 0.039 | 0.035 ± 0.039 | 0.367                     |
| <b>80°</b>                      | 0.144 ± 0.099 | 0.139 ± 0.092 | 0.115                     | 0.034 ± 0.036 | 0.033 ± 0.036 | 0.955                     |
| <b>90°</b>                      | 0.140 ± 0.091 | 0.135 ± 0.092 | 0.065                     | 0.036 ± 0.039 | 0.037 ± 0.041 | 0.929                     |
| <b>100°</b>                     | 0.135 ± 0.088 | 0.133 ± 0.089 | 0.352                     | 0.034 ± 0.039 | 0.035 ± 0.041 | 0.268                     |
| <b>110°</b>                     | 0.138 ± 0.089 | 0.137 ± 0.091 | 0.804                     | 0.031 ± 0.038 | 0.032 ± 0.039 | 0.417                     |
| <b>120°</b>                     | 0.144 ± 0.092 | 0.140 ± 0.093 | 0.052                     | 0.032 ± 0.039 | 0.034 ± 0.040 | 0.077                     |
| <b>130°</b>                     | 0.143 ± 0.091 | 0.140 ± 0.090 | 0.058                     | 0.034 ± 0.040 | 0.035 ± 0.040 | 0.635                     |
| <b>140°</b>                     | 0.148 ± 0.089 | 0.146 ± 0.092 | 0.154                     | 0.037 ± 0.041 | 0.038 ± 0.042 | 0.742                     |
| <b>150°</b>                     | 0.157 ± 0.099 | 0.152 ± 0.093 | 0.007                     | 0.042 ± 0.044 | 0.043 ± 0.044 | 0.539                     |
| <b>160°</b>                     | 0.171 ± 0.100 | 0.171 ± 0.105 | 0.766                     | 0.053 ± 0.048 | 0.053 ± 0.049 | 0.639                     |
| <b>170°</b>                     | 0.180 ± 0.092 | 0.183 ± 0.096 | 0.101                     | 0.059 ± 0.051 | 0.059 ± 0.052 | 0.779                     |
| <b>180°</b>                     | 0.200 ± 0.098 | 0.196 ± 0.093 | 0.047                     | 0.066 ± 0.054 | 0.065 ± 0.057 | 0.446                     |
| <b>190°</b>                     | 0.216 ± 0.104 | 0.210 ± 0.099 | 0.001                     | 0.071 ± 0.057 | 0.072 ± 0.057 | 0.301                     |
| <b>200°</b>                     | 0.214 ± 0.101 | 0.216 ± 0.101 | 0.620                     | 0.077 ± 0.058 | 0.079 ± 0.058 | 0.035                     |
| <b>210°</b>                     | 0.211 ± 0.106 | 0.208 ± 0.105 | 0.133                     | 0.074 ± 0.057 | 0.078 ± 0.059 | 0.009                     |
| <b>220°</b>                     | 0.201 ± 0.101 | 0.198 ± 0.094 | 0.266                     | 0.073 ± 0.058 | 0.075 ± 0.060 | 0.012                     |
| <b>230°</b>                     | 0.183 ± 0.092 | 0.180 ± 0.084 | 0.170                     | 0.058 ± 0.050 | 0.061 ± 0.053 | 0.006                     |
| <b>240°</b>                     | 0.171 ± 0.095 | 0.170 ± 0.089 | 0.730                     | 0.049 ± 0.052 | 0.052 ± 0.053 | 0.044                     |
| <b>250°</b>                     | 0.170 ± 0.094 | 0.166 ± 0.092 | 0.202                     | 0.042 ± 0.046 | 0.046 ± 0.049 | <0.001                    |
| <b>260°</b>                     | 0.174 ± 0.112 | 0.172 ± 0.099 | 0.646                     | 0.046 ± 0.050 | 0.046 ± 0.050 | 0.955                     |
| <b>270°</b>                     | 0.170 ± 0.106 | 0.171 ± 0.105 | 0.613                     | 0.046 ± 0.046 | 0.043 ± 0.047 | 0.111                     |
| <b>280°</b>                     | 0.175 ± 0.104 | 0.177 ± 0.100 | 0.414                     | 0.047 ± 0.049 | 0.049 ± 0.051 | 0.145                     |

|      |               |               |       |               |               |        |
|------|---------------|---------------|-------|---------------|---------------|--------|
| 290° | 0.184 ± 0.104 | 0.183 ± 0.099 | 0.626 | 0.053 ± 0.050 | 0.057 ± 0.053 | 0.002  |
| 300° | 0.191 ± 0.099 | 0.191 ± 0.093 | 0.893 | 0.063 ± 0.052 | 0.068 ± 0.054 | <0.001 |
| 310° | 0.203 ± 0.110 | 0.204 ± 0.103 | 0.738 | 0.072 ± 0.053 | 0.074 ± 0.055 | 0.053  |
| 320° | 0.210 ± 0.096 | 0.208 ± 0.097 | 0.434 | 0.078 ± 0.057 | 0.081 ± 0.059 | 0.022  |
| 330° | 0.218 ± 0.105 | 0.217 ± 0.101 | 0.786 | 0.084 ± 0.057 | 0.089 ± 0.060 | <0.001 |
| 340° | 0.215 ± 0.102 | 0.215 ± 0.102 | 0.915 | 0.083 ± 0.055 | 0.085 ± 0.057 | 0.050  |
| 350° | 0.215 ± 0.111 | 0.215 ± 0.110 | 0.971 | 0.080 ± 0.054 | 0.081 ± 0.055 | 0.110  |

AOD = angle opening distance; TISA = trabecular iris space area; SD = standard deviation; DLLSS = deep learning located scleral spur; MPSS = manual plotted scleral spur; PACD = primary angle-closure disease.

<sup>a</sup>:independent t-test.

**Supplemental material: table 3** Comparisons of DLLSS-based parameters (mean ± SD) between Dark1 and Dark2 dataset, full version of 36 angles.

| AOD750 (mm) |               |               |                     |               |               |                     |
|-------------|---------------|---------------|---------------------|---------------|---------------|---------------------|
| Angles      | Normal        |               |                     | PACD          |               |                     |
|             | DARK1         | DARK2         | PValue <sup>a</sup> | DARK1         | DARK2         | PValue <sup>a</sup> |
| Mean        | 0.390 ± 0.201 | 0.376 ± 0.185 | <0.001              | 0.129 ± 0.077 | 0.133 ± 0.083 | 0.001               |
| 0°          | 0.434 ± 0.250 | 0.411 ± 0.231 | <0.001              | 0.150 ± 0.091 | 0.143 ± 0.095 | 0.016               |
| 10°         | 0.396 ± 0.202 | 0.386 ± 0.197 | 0.071               | 0.141 ± 0.087 | 0.143 ± 0.091 | 0.487               |
| 20°         | 0.392 ± 0.219 | 0.364 ± 0.184 | <0.001              | 0.127 ± 0.089 | 0.121 ± 0.087 | 0.025               |
| 30°         | 0.379 ± 0.205 | 0.358 ± 0.186 | <0.001              | 0.112 ± 0.083 | 0.112 ± 0.088 | 0.967               |
| 40°         | 0.359 ± 0.203 | 0.345 ± 0.188 | 0.006               | 0.106 ± 0.078 | 0.111 ± 0.103 | 0.360               |
| 50°         | 0.349 ± 0.200 | 0.339 ± 0.183 | 0.069               | 0.098 ± 0.075 | 0.105 ± 0.121 | 0.330               |
| 60°         | 0.340 ± 0.211 | 0.321 ± 0.187 | 0.003               | 0.098 ± 0.082 | 0.102 ± 0.088 | 0.322               |
| 70°         | 0.343 ± 0.205 | 0.329 ± 0.197 | 0.057               | 0.100 ± 0.078 | 0.104 ± 0.093 | 0.237               |
| 80°         | 0.339 ± 0.199 | 0.329 ± 0.191 | 0.117               | 0.106 ± 0.080 | 0.110 ± 0.101 | 0.344               |
| 90°         | 0.334 ± 0.198 | 0.335 ± 0.190 | 0.745               | 0.103 ± 0.079 | 0.103 ± 0.098 | 0.952               |
| 100°        | 0.322 ± 0.188 | 0.329 ± 0.210 | 0.481               | 0.094 ± 0.077 | 0.092 ± 0.088 | 0.547               |
| 110°        | 0.317 ± 0.188 | 0.320 ± 0.175 | 0.611               | 0.088 ± 0.078 | 0.092 ± 0.105 | 0.435               |
| 120°        | 0.327 ± 0.194 | 0.315 ± 0.186 | 0.014               | 0.086 ± 0.075 | 0.083 ± 0.077 | 0.248               |
| 130°        | 0.321 ± 0.187 | 0.317 ± 0.181 | 0.444               | 0.084 ± 0.076 | 0.089 ± 0.084 | 0.045               |
| 140°        | 0.326 ± 0.186 | 0.314 ± 0.182 | 0.017               | 0.093 ± 0.080 | 0.092 ± 0.082 | 0.737               |
| 150°        | 0.341 ± 0.200 | 0.329 ± 0.190 | 0.011               | 0.098 ± 0.083 | 0.098 ± 0.090 | 0.989               |
| 160°        | 0.367 ± 0.206 | 0.347 ± 0.188 | <0.001              | 0.113 ± 0.085 | 0.107 ± 0.086 | 0.039               |
| 170°        | 0.378 ± 0.195 | 0.369 ± 0.178 | 0.033               | 0.130 ± 0.096 | 0.131 ± 0.102 | 0.670               |
| 180°        | 0.419 ± 0.206 | 0.394 ± 0.194 | <0.001              | 0.143 ± 0.100 | 0.142 ± 0.103 | 0.497               |
| 190°        | 0.457 ± 0.228 | 0.443 ± 0.217 | 0.016               | 0.163 ± 0.106 | 0.163 ± 0.110 | 0.868               |
| 200°        | 0.464 ± 0.208 | 0.450 ± 0.218 | 0.035               | 0.174 ± 0.114 | 0.174 ± 0.112 | 0.977               |
| 210°        | 0.467 ± 0.243 | 0.443 ± 0.203 | 0.003               | 0.166 ± 0.109 | 0.179 ± 0.114 | <0.001              |
| 220°        | 0.442 ± 0.221 | 0.412 ± 0.208 | <0.001              | 0.162 ± 0.105 | 0.164 ± 0.106 | 0.636               |

|                                 |               |               |                            |               |               |                            |
|---------------------------------|---------------|---------------|----------------------------|---------------|---------------|----------------------------|
| 230°                            | 0.409 ± 0.213 | 0.395 ± 0.195 | 0.101                      | 0.141 ± 0.099 | 0.151 ± 0.102 | 0.008                      |
| 240°                            | 0.381 ± 0.205 | 0.373 ± 0.186 | 0.157                      | 0.124 ± 0.104 | 0.127 ± 0.107 | 0.469                      |
| 250°                            | 0.389 ± 0.205 | 0.369 ± 0.200 | 0.014                      | 0.115 ± 0.097 | 0.133 ± 0.109 | <0.001                     |
| 260°                            | 0.387 ± 0.225 | 0.373 ± 0.206 | 0.048                      | 0.127 ± 0.107 | 0.137 ± 0.114 | 0.003                      |
| 270°                            | 0.388 ± 0.233 | 0.379 ± 0.211 | 0.195                      | 0.124 ± 0.103 | 0.140 ± 0.114 | <0.001                     |
| 280°                            | 0.391 ± 0.217 | 0.376 ± 0.187 | 0.009                      | 0.122 ± 0.100 | 0.141 ± 0.117 | <0.001                     |
| 290°                            | 0.404 ± 0.235 | 0.388 ± 0.206 | 0.008                      | 0.132 ± 0.099 | 0.146 ± 0.113 | 0.009                      |
| 300°                            | 0.417 ± 0.226 | 0.397 ± 0.210 | <0.001                     | 0.145 ± 0.097 | 0.153 ± 0.108 | 0.176                      |
| 310°                            | 0.438 ± 0.239 | 0.422 ± 0.198 | 0.013                      | 0.164 ± 0.095 | 0.173 ± 0.107 | 0.069                      |
| 320°                            | 0.447 ± 0.219 | 0.434 ± 0.212 | 0.021                      | 0.172 ± 0.102 | 0.184 ± 0.113 | 0.009                      |
| 330°                            | 0.464 ± 0.238 | 0.444 ± 0.219 | <0.001                     | 0.177 ± 0.101 | 0.189 ± 0.108 | 0.003                      |
| 340°                            | 0.459 ± 0.233 | 0.443 ± 0.219 | 0.001                      | 0.177 ± 0.095 | 0.185 ± 0.102 | 0.025                      |
| 350°                            | 0.456 ± 0.253 | 0.437 ± 0.229 | <0.001                     | 0.169 ± 0.091 | 0.170 ± 0.099 | 0.812                      |
| <b>TISA750 (mm<sup>2</sup>)</b> |               |               |                            |               |               |                            |
| <b>Angles</b>                   | <b>Normal</b> |               |                            | <b>PACD</b>   |               |                            |
|                                 | <b>DARK1</b>  | <b>DARK2</b>  | <b>P Value<sup>a</sup></b> | <b>DARK1</b>  | <b>DARK2</b>  | <b>P Value<sup>a</sup></b> |
| <b>Mean</b>                     | 0.178 ± 0.090 | 0.168 ± 0.083 | <0.001                     | 0.055 ± 0.038 | 0.055 ± 0.040 | 0.564                      |
| <b>0°</b>                       | 0.205 ± 0.115 | 0.193 ± 0.104 | <0.001                     | 0.075 ± 0.056 | 0.068 ± 0.055 | <0.001                     |
| <b>10°</b>                      | 0.189 ± 0.095 | 0.182 ± 0.091 | 0.003                      | 0.073 ± 0.057 | 0.072 ± 0.056 | 0.871                      |
| <b>20°</b>                      | 0.187 ± 0.100 | 0.168 ± 0.088 | <0.001                     | 0.062 ± 0.054 | 0.059 ± 0.054 | 0.175                      |
| <b>30°</b>                      | 0.175 ± 0.094 | 0.164 ± 0.091 | <0.001                     | 0.049 ± 0.049 | 0.048 ± 0.049 | 0.557                      |
| <b>40°</b>                      | 0.165 ± 0.096 | 0.151 ± 0.088 | <0.001                     | 0.044 ± 0.043 | 0.043 ± 0.049 | 0.664                      |
| <b>50°</b>                      | 0.155 ± 0.093 | 0.145 ± 0.086 | 0.002                      | 0.037 ± 0.038 | 0.036 ± 0.050 | 0.922                      |
| <b>60°</b>                      | 0.142 ± 0.094 | 0.133 ± 0.087 | 0.004                      | 0.034 ± 0.038 | 0.034 ± 0.039 | 0.772                      |
| <b>70°</b>                      | 0.144 ± 0.091 | 0.138 ± 0.094 | 0.112                      | 0.034 ± 0.039 | 0.035 ± 0.041 | 0.639                      |
| <b>80°</b>                      | 0.144 ± 0.099 | 0.135 ± 0.090 | 0.047                      | 0.034 ± 0.036 | 0.037 ± 0.050 | 0.191                      |
| <b>90°</b>                      | 0.140 ± 0.091 | 0.141 ± 0.094 | 0.829                      | 0.036 ± 0.039 | 0.036 ± 0.047 | 0.668                      |
| <b>100°</b>                     | 0.135 ± 0.088 | 0.141 ± 0.115 | 0.420                      | 0.034 ± 0.039 | 0.033 ± 0.040 | 0.391                      |
| <b>110°</b>                     | 0.138 ± 0.089 | 0.137 ± 0.086 | 0.835                      | 0.031 ± 0.038 | 0.030 ± 0.042 | 0.592                      |
| <b>120°</b>                     | 0.144 ± 0.092 | 0.134 ± 0.091 | <0.001                     | 0.032 ± 0.039 | 0.032 ± 0.038 | 0.633                      |
| <b>130°</b>                     | 0.143 ± 0.091 | 0.138 ± 0.087 | 0.049                      | 0.034 ± 0.040 | 0.034 ± 0.041 | 0.867                      |
| <b>140°</b>                     | 0.148 ± 0.089 | 0.141 ± 0.089 | 0.007                      | 0.037 ± 0.041 | 0.038 ± 0.043 | 0.484                      |
| <b>150°</b>                     | 0.157 ± 0.099 | 0.147 ± 0.093 | <0.001                     | 0.042 ± 0.044 | 0.041 ± 0.048 | 0.409                      |
| <b>160°</b>                     | 0.171 ± 0.100 | 0.161 ± 0.094 | <0.001                     | 0.053 ± 0.048 | 0.047 ± 0.046 | 0.002                      |
| <b>170°</b>                     | 0.180 ± 0.092 | 0.174 ± 0.089 | 0.003                      | 0.059 ± 0.051 | 0.059 ± 0.055 | 0.745                      |
| <b>180°</b>                     | 0.200 ± 0.098 | 0.184 ± 0.092 | <0.001                     | 0.066 ± 0.054 | 0.064 ± 0.055 | 0.293                      |
| <b>190°</b>                     | 0.216 ± 0.104 | 0.209 ± 0.109 | 0.056                      | 0.071 ± 0.057 | 0.068 ± 0.057 | 0.025                      |
| <b>200°</b>                     | 0.214 ± 0.101 | 0.207 ± 0.101 | 0.037                      | 0.077 ± 0.058 | 0.075 ± 0.055 | 0.263                      |
| <b>210°</b>                     | 0.211 ± 0.106 | 0.199 ± 0.087 | 0.005                      | 0.074 ± 0.057 | 0.074 ± 0.058 | 0.836                      |
| <b>220°</b>                     | 0.201 ± 0.101 | 0.180 ± 0.087 | <0.001                     | 0.073 ± 0.058 | 0.071 ± 0.056 | 0.428                      |
| <b>230°</b>                     | 0.183 ± 0.092 | 0.177 ± 0.090 | 0.128                      | 0.058 ± 0.050 | 0.059 ± 0.052 | 0.458                      |
| <b>240°</b>                     | 0.171 ± 0.095 | 0.164 ± 0.088 | 0.020                      | 0.049 ± 0.052 | 0.048 ± 0.050 | 0.501                      |

|      |               |               |        |               |               |        |
|------|---------------|---------------|--------|---------------|---------------|--------|
| 250° | 0.170 ± 0.094 | 0.165 ± 0.098 | 0.209  | 0.042 ± 0.046 | 0.048 ± 0.051 | <0.001 |
| 260° | 0.174 ± 0.112 | 0.163 ± 0.094 | 0.017  | 0.046 ± 0.050 | 0.050 ± 0.052 | 0.057  |
| 270° | 0.170 ± 0.106 | 0.165 ± 0.094 | 0.214  | 0.046 ± 0.046 | 0.050 ± 0.052 | 0.031  |
| 280° | 0.175 ± 0.104 | 0.163 ± 0.090 | <0.001 | 0.047 ± 0.049 | 0.054 ± 0.053 | <0.001 |
| 290° | 0.184 ± 0.104 | 0.173 ± 0.092 | 0.001  | 0.053 ± 0.050 | 0.058 ± 0.055 | 0.070  |
| 300° | 0.191 ± 0.099 | 0.178 ± 0.090 | <0.001 | 0.063 ± 0.052 | 0.065 ± 0.055 | 0.601  |
| 310° | 0.203 ± 0.110 | 0.193 ± 0.090 | 0.004  | 0.072 ± 0.053 | 0.075 ± 0.058 | 0.256  |
| 320° | 0.210 ± 0.096 | 0.199 ± 0.095 | 0.003  | 0.078 ± 0.057 | 0.082 ± 0.061 | 0.193  |
| 330° | 0.218 ± 0.105 | 0.208 ± 0.095 | <0.001 | 0.084 ± 0.057 | 0.087 ± 0.057 | 0.167  |
| 340° | 0.215 ± 0.102 | 0.206 ± 0.099 | <0.001 | 0.083 ± 0.055 | 0.085 ± 0.054 | 0.271  |
| 350° | 0.215 ± 0.111 | 0.207 ± 0.104 | 0.002  | 0.080 ± 0.054 | 0.081 ± 0.056 | 0.361  |

AOD = angle opening distance; TISA = trabecular iris space area; SD = standard deviation; DLLSS = deep learning located scleral spur; MPSS = manual plotted scleral spur; PACD = primary angle-closure disease.

<sup>a</sup>independent t-test.

**Supplemental material: table 4** Comparisons of MPSS-based parameters (mean ± SD) between Dark1 and Dark2 dataset, full version of 36 angles.

| AOD750 (mm) |               |               |                      |               |               |                      |
|-------------|---------------|---------------|----------------------|---------------|---------------|----------------------|
| Angles      | Normal        |               |                      | PACD          |               |                      |
|             | DARK1         | DARK2         | P Value <sup>a</sup> | DARK1         | DARK2         | P Value <sup>a</sup> |
| Mean        | 0.385 ± 0.193 | 0.386 ± 0.203 | <0.001               | 0.126 ± 0.079 | 0.134 ± 0.079 | 0.008                |
| 0°          | 0.433 ± 0.242 | 0.440 ± 0.238 | 0.293                | 0.148 ± 0.093 | 0.153 ± 0.100 | 0.148                |
| 10°         | 0.394 ± 0.207 | 0.421 ± 0.223 | <0.001               | 0.139 ± 0.092 | 0.156 ± 0.095 | <0.001               |
| 20°         | 0.385 ± 0.206 | 0.395 ± 0.216 | 0.148                | 0.129 ± 0.088 | 0.127 ± 0.092 | 0.408                |
| 30°         | 0.379 ± 0.201 | 0.382 ± 0.200 | 0.761                | 0.112 ± 0.086 | 0.120 ± 0.093 | 0.068                |
| 40°         | 0.355 ± 0.196 | 0.378 ± 0.217 | 0.004                | 0.109 ± 0.083 | 0.113 ± 0.080 | 0.398                |
| 50°         | 0.346 ± 0.196 | 0.366 ± 0.207 | 0.004                | 0.096 ± 0.079 | 0.107 ± 0.095 | 0.027                |
| 60°         | 0.343 ± 0.200 | 0.349 ± 0.231 | 0.514                | 0.102 ± 0.079 | 0.106 ± 0.084 | 0.275                |
| 70°         | 0.341 ± 0.204 | 0.347 ± 0.215 | 0.356                | 0.101 ± 0.079 | 0.110 ± 0.091 | 0.063                |
| 80°         | 0.333 ± 0.193 | 0.345 ± 0.221 | 0.096                | 0.102 ± 0.078 | 0.108 ± 0.083 | 0.090                |
| 90°         | 0.318 ± 0.196 | 0.345 ± 0.198 | <0.001               | 0.098 ± 0.082 | 0.103 ± 0.087 | 0.248                |
| 100°        | 0.315 ± 0.188 | 0.331 ± 0.215 | 0.022                | 0.091 ± 0.080 | 0.099 ± 0.085 | 0.046                |
| 110°        | 0.318 ± 0.190 | 0.328 ± 0.193 | 0.197                | 0.086 ± 0.079 | 0.091 ± 0.083 | 0.289                |
| 120°        | 0.318 ± 0.193 | 0.334 ± 0.207 | 0.010                | 0.085 ± 0.078 | 0.082 ± 0.079 | 0.389                |
| 130°        | 0.310 ± 0.183 | 0.338 ± 0.201 | <0.001               | 0.081 ± 0.075 | 0.093 ± 0.080 | 0.002                |
| 140°        | 0.321 ± 0.191 | 0.338 ± 0.190 | 0.003                | 0.090 ± 0.080 | 0.097 ± 0.082 | 0.033                |
| 150°        | 0.333 ± 0.193 | 0.348 ± 0.199 | 0.006                | 0.095 ± 0.080 | 0.101 ± 0.090 | 0.099                |
| 160°        | 0.367 ± 0.212 | 0.374 ± 0.208 | 0.272                | 0.109 ± 0.088 | 0.113 ± 0.089 | 0.267                |
| 170°        | 0.383 ± 0.201 | 0.394 ± 0.191 | 0.085                | 0.127 ± 0.097 | 0.141 ± 0.104 | <0.001               |
| 180°        | 0.409 ± 0.196 | 0.427 ± 0.206 | 0.002                | 0.140 ± 0.104 | 0.148 ± 0.109 | 0.022                |

|                                 |               |               |                           |               |               |                           |
|---------------------------------|---------------|---------------|---------------------------|---------------|---------------|---------------------------|
| 190°                            | 0.441 ± 0.217 | 0.458 ± 0.229 | 0.009                     | 0.160 ± 0.107 | 0.170 ± 0.112 | 0.013                     |
| 200°                            | 0.458 ± 0.208 | 0.473 ± 0.237 | 0.078                     | 0.174 ± 0.115 | 0.181 ± 0.111 | 0.111                     |
| 210°                            | 0.455 ± 0.232 | 0.473 ± 0.244 | 0.019                     | 0.170 ± 0.111 | 0.180 ± 0.111 | 0.046                     |
| 220°                            | 0.434 ± 0.213 | 0.436 ± 0.220 | 0.848                     | 0.164 ± 0.110 | 0.169 ± 0.103 | 0.352                     |
| 230°                            | 0.400 ± 0.192 | 0.418 ± 0.229 | 0.018                     | 0.144 ± 0.102 | 0.149 ± 0.100 | 0.337                     |
| 240°                            | 0.375 ± 0.185 | 0.392 ± 0.216 | 0.022                     | 0.128 ± 0.104 | 0.132 ± 0.101 | 0.467                     |
| 250°                            | 0.375 ± 0.197 | 0.383 ± 0.212 | 0.310                     | 0.119 ± 0.104 | 0.126 ± 0.104 | 0.165                     |
| 260°                            | 0.386 ± 0.216 | 0.374 ± 0.235 | 0.189                     | 0.125 ± 0.105 | 0.126 ± 0.105 | 0.872                     |
| 270°                            | 0.385 ± 0.228 | 0.393 ± 0.233 | 0.347                     | 0.116 ± 0.105 | 0.131 ± 0.101 | 0.003                     |
| 280°                            | 0.394 ± 0.212 | 0.386 ± 0.203 | 0.398                     | 0.127 ± 0.104 | 0.127 ± 0.103 | 0.951                     |
| 290°                            | 0.392 ± 0.213 | 0.412 ± 0.238 | 0.016                     | 0.135 ± 0.101 | 0.136 ± 0.103 | 0.891                     |
| 300°                            | 0.414 ± 0.204 | 0.415 ± 0.229 | 0.887                     | 0.152 ± 0.103 | 0.145 ± 0.097 | 0.154                     |
| 310°                            | 0.436 ± 0.227 | 0.438 ± 0.207 | 0.827                     | 0.164 ± 0.100 | 0.167 ± 0.099 | 0.408                     |
| 320°                            | 0.437 ± 0.214 | 0.445 ± 0.212 | 0.310                     | 0.176 ± 0.102 | 0.177 ± 0.105 | 0.779                     |
| 330°                            | 0.461 ± 0.230 | 0.462 ± 0.221 | 0.925                     | 0.184 ± 0.109 | 0.188 ± 0.106 | 0.331                     |
| 340°                            | 0.454 ± 0.230 | 0.462 ± 0.239 | 0.226                     | 0.178 ± 0.098 | 0.178 ± 0.095 | 0.910                     |
| 350°                            | 0.452 ± 0.244 | 0.455 ± 0.229 | 0.618                     | 0.167 ± 0.097 | 0.172 ± 0.099 | 0.152                     |
| <b>TISA750 (mm<sup>2</sup>)</b> |               |               |                           |               |               |                           |
| <b>Angles</b>                   | <b>Normal</b> |               |                           | <b>PACD</b>   |               |                           |
|                                 | <b>DARK1</b>  | <b>DARK2</b>  | <b>PValue<sup>a</sup></b> | <b>DARK1</b>  | <b>DARK2</b>  | <b>PValue<sup>a</sup></b> |
| <b>Mean</b>                     | 0.176 ± 0.087 | 0.180 ± 0.096 | 0.013                     | 0.056 ± 0.039 | 0.054 ± 0.038 | 0.064                     |
| <b>0°</b>                       | 0.203 ± 0.109 | 0.208 ± 0.111 | 0.088                     | 0.076 ± 0.057 | 0.071 ± 0.057 | 0.035                     |
| <b>10°</b>                      | 0.189 ± 0.096 | 0.197 ± 0.105 | 0.016                     | 0.073 ± 0.057 | 0.075 ± 0.057 | 0.208                     |
| <b>20°</b>                      | 0.182 ± 0.091 | 0.185 ± 0.103 | 0.445                     | 0.062 ± 0.053 | 0.061 ± 0.055 | 0.412                     |
| <b>30°</b>                      | 0.176 ± 0.094 | 0.177 ± 0.103 | 0.786                     | 0.051 ± 0.049 | 0.051 ± 0.051 | 0.998                     |
| <b>40°</b>                      | 0.163 ± 0.095 | 0.171 ± 0.106 | 0.114                     | 0.047 ± 0.044 | 0.042 ± 0.040 | 0.012                     |
| <b>50°</b>                      | 0.153 ± 0.088 | 0.162 ± 0.103 | 0.029                     | 0.038 ± 0.039 | 0.035 ± 0.040 | 0.230                     |
| <b>60°</b>                      | 0.147 ± 0.093 | 0.153 ± 0.117 | 0.150                     | 0.035 ± 0.037 | 0.034 ± 0.035 | 0.433                     |
| <b>70°</b>                      | 0.143 ± 0.091 | 0.146 ± 0.102 | 0.518                     | 0.035 ± 0.039 | 0.035 ± 0.040 | 0.987                     |
| <b>80°</b>                      | 0.139 ± 0.092 | 0.148 ± 0.111 | 0.051                     | 0.033 ± 0.036 | 0.035 ± 0.036 | 0.351                     |
| <b>90°</b>                      | 0.135 ± 0.092 | 0.148 ± 0.100 | 0.002                     | 0.037 ± 0.041 | 0.033 ± 0.039 | 0.076                     |
| <b>100°</b>                     | 0.133 ± 0.089 | 0.144 ± 0.108 | 0.006                     | 0.035 ± 0.041 | 0.033 ± 0.039 | 0.182                     |
| <b>110°</b>                     | 0.137 ± 0.091 | 0.143 ± 0.094 | 0.164                     | 0.032 ± 0.039 | 0.030 ± 0.036 | 0.186                     |
| <b>120°</b>                     | 0.140 ± 0.093 | 0.145 ± 0.103 | 0.144                     | 0.034 ± 0.040 | 0.032 ± 0.040 | 0.152                     |
| <b>130°</b>                     | 0.140 ± 0.090 | 0.150 ± 0.098 | 0.016                     | 0.035 ± 0.040 | 0.034 ± 0.040 | 0.815                     |
| <b>140°</b>                     | 0.146 ± 0.092 | 0.154 ± 0.096 | 0.010                     | 0.038 ± 0.042 | 0.039 ± 0.044 | 0.437                     |
| <b>150°</b>                     | 0.152 ± 0.093 | 0.159 ± 0.101 | 0.029                     | 0.043 ± 0.044 | 0.042 ± 0.050 | 0.569                     |
| <b>160°</b>                     | 0.171 ± 0.105 | 0.172 ± 0.103 | 0.781                     | 0.053 ± 0.049 | 0.049 ± 0.049 | 0.035                     |
| <b>170°</b>                     | 0.183 ± 0.096 | 0.186 ± 0.096 | 0.287                     | 0.059 ± 0.052 | 0.062 ± 0.057 | 0.069                     |
| <b>180°</b>                     | 0.196 ± 0.093 | 0.199 ± 0.102 | 0.283                     | 0.065 ± 0.057 | 0.066 ± 0.057 | 0.584                     |
| <b>190°</b>                     | 0.210 ± 0.099 | 0.218 ± 0.115 | 0.040                     | 0.072 ± 0.057 | 0.070 ± 0.058 | 0.281                     |
| <b>200°</b>                     | 0.216 ± 0.101 | 0.218 ± 0.114 | 0.517                     | 0.079 ± 0.058 | 0.076 ± 0.055 | 0.240                     |

|             |               |               |       |               |               |        |
|-------------|---------------|---------------|-------|---------------|---------------|--------|
| <b>210°</b> | 0.208 ± 0.105 | 0.217 ± 0.108 | 0.030 | 0.078 ± 0.059 | 0.074 ± 0.057 | 0.159  |
| <b>220°</b> | 0.198 ± 0.094 | 0.195 ± 0.106 | 0.637 | 0.075 ± 0.060 | 0.071 ± 0.054 | 0.101  |
| <b>230°</b> | 0.180 ± 0.084 | 0.190 ± 0.108 | 0.013 | 0.061 ± 0.053 | 0.058 ± 0.051 | 0.210  |
| <b>240°</b> | 0.170 ± 0.089 | 0.177 ± 0.107 | 0.082 | 0.052 ± 0.053 | 0.050 ± 0.048 | 0.426  |
| <b>250°</b> | 0.166 ± 0.092 | 0.168 ± 0.101 | 0.710 | 0.046 ± 0.049 | 0.045 ± 0.049 | 0.645  |
| <b>260°</b> | 0.172 ± 0.099 | 0.167 ± 0.115 | 0.220 | 0.046 ± 0.050 | 0.044 ± 0.048 | 0.248  |
| <b>270°</b> | 0.171 ± 0.105 | 0.172 ± 0.107 | 0.847 | 0.043 ± 0.047 | 0.044 ± 0.046 | 0.791  |
| <b>280°</b> | 0.177 ± 0.100 | 0.171 ± 0.107 | 0.212 | 0.049 ± 0.051 | 0.046 ± 0.049 | 0.224  |
| <b>290°</b> | 0.183 ± 0.099 | 0.188 ± 0.112 | 0.200 | 0.057 ± 0.053 | 0.053 ± 0.054 | 0.092  |
| <b>300°</b> | 0.191 ± 0.093 | 0.191 ± 0.106 | 0.893 | 0.068 ± 0.054 | 0.060 ± 0.051 | <0.001 |
| <b>310°</b> | 0.204 ± 0.103 | 0.206 ± 0.099 | 0.627 | 0.074 ± 0.055 | 0.072 ± 0.056 | 0.224  |
| <b>320°</b> | 0.208 ± 0.097 | 0.207 ± 0.102 | 0.836 | 0.081 ± 0.059 | 0.078 ± 0.059 | 0.201  |
| <b>330°</b> | 0.217 ± 0.101 | 0.218 ± 0.105 | 0.834 | 0.089 ± 0.060 | 0.087 ± 0.059 | 0.446  |
| <b>340°</b> | 0.215 ± 0.102 | 0.217 ± 0.111 | 0.550 | 0.085 ± 0.057 | 0.083 ± 0.054 | 0.329  |
| <b>350°</b> | 0.215 ± 0.110 | 0.217 ± 0.108 | 0.296 | 0.081 ± 0.055 | 0.082 ± 0.056 | 0.794  |

AOD = angle opening distance; TISA = trabecular iris space area; SD = standard deviation; MPSS = manual plotted scleral spur; PACD = primary angle-closure disease.

<sup>a</sup>:independent t-test.
