# Supplementary material
Source: HighWire-hosted journal article supplement (https://bjo.bmj.com/content/107/6/802)
Supplement: inline-supplementary-material-6 [file inline-supplementary-material-6.pdf]

**Supplemental Table 1** Comparisons of DLLSS-based parameters (mean  $\pm$  SD) between Dark1 and Dark2 dataset.

| AOD750 (mm)                |                   |                   |                      |                   |                   |                      |
|----------------------------|-------------------|-------------------|----------------------|-------------------|-------------------|----------------------|
| Angles                     | Normal            |                   |                      | PACD              |                   |                      |
|                            | DARK1             | DARK2             | P Value <sup>a</sup> | DARK1             | DARK2             | P Value <sup>a</sup> |
| Mean                       | 0.390 $\pm$ 0.201 | 0.376 $\pm$ 0.185 | <0.001               | 0.129 $\pm$ 0.077 | 0.133 $\pm$ 0.083 | 0.001                |
| 0°                         | 0.434 $\pm$ 0.250 | 0.411 $\pm$ 0.231 | <0.001               | 0.150 $\pm$ 0.091 | 0.143 $\pm$ 0.095 | 0.016                |
| 30°                        | 0.379 $\pm$ 0.205 | 0.358 $\pm$ 0.186 | <0.001               | 0.112 $\pm$ 0.083 | 0.112 $\pm$ 0.088 | 0.967                |
| 60°                        | 0.340 $\pm$ 0.211 | 0.321 $\pm$ 0.187 | 0.003                | 0.098 $\pm$ 0.082 | 0.102 $\pm$ 0.088 | 0.322                |
| 90°                        | 0.334 $\pm$ 0.198 | 0.335 $\pm$ 0.190 | 0.745                | 0.103 $\pm$ 0.079 | 0.103 $\pm$ 0.098 | 0.952                |
| 120°                       | 0.327 $\pm$ 0.194 | 0.315 $\pm$ 0.186 | 0.014                | 0.086 $\pm$ 0.075 | 0.083 $\pm$ 0.077 | 0.248                |
| 150°                       | 0.341 $\pm$ 0.200 | 0.329 $\pm$ 0.190 | 0.011                | 0.098 $\pm$ 0.083 | 0.098 $\pm$ 0.090 | 0.989                |
| 180°                       | 0.419 $\pm$ 0.206 | 0.394 $\pm$ 0.194 | <0.001               | 0.143 $\pm$ 0.100 | 0.142 $\pm$ 0.103 | 0.497                |
| 210°                       | 0.467 $\pm$ 0.243 | 0.443 $\pm$ 0.203 | 0.003                | 0.166 $\pm$ 0.109 | 0.179 $\pm$ 0.114 | <0.001               |
| 240°                       | 0.381 $\pm$ 0.205 | 0.373 $\pm$ 0.186 | 0.157                | 0.124 $\pm$ 0.104 | 0.127 $\pm$ 0.107 | 0.469                |
| 270°                       | 0.388 $\pm$ 0.233 | 0.379 $\pm$ 0.211 | 0.195                | 0.124 $\pm$ 0.103 | 0.140 $\pm$ 0.114 | <0.001               |
| 300°                       | 0.417 $\pm$ 0.226 | 0.397 $\pm$ 0.210 | <0.001               | 0.145 $\pm$ 0.097 | 0.153 $\pm$ 0.108 | 0.176                |
| 330°                       | 0.464 $\pm$ 0.238 | 0.444 $\pm$ 0.219 | <0.001               | 0.177 $\pm$ 0.101 | 0.189 $\pm$ 0.108 | 0.003                |
| TISA750 (mm <sup>2</sup> ) |                   |                   |                      |                   |                   |                      |
| Angles                     | Normal            |                   |                      | PACD              |                   |                      |
|                            | DARK1             | DARK2             | P Value <sup>a</sup> | DARK1             | DARK2             | P Value <sup>a</sup> |
| Mean                       | 0.178 $\pm$ 0.090 | 0.168 $\pm$ 0.083 | <0.001               | 0.055 $\pm$ 0.038 | 0.055 $\pm$ 0.040 | 0.564                |
| 0°                         | 0.205 $\pm$ 0.115 | 0.193 $\pm$ 0.104 | <0.001               | 0.075 $\pm$ 0.056 | 0.068 $\pm$ 0.055 | <0.001               |
| 30°                        | 0.175 $\pm$ 0.094 | 0.164 $\pm$ 0.091 | <0.001               | 0.049 $\pm$ 0.049 | 0.048 $\pm$ 0.049 | 0.557                |
| 60°                        | 0.142 $\pm$ 0.094 | 0.133 $\pm$ 0.087 | 0.004                | 0.034 $\pm$ 0.038 | 0.034 $\pm$ 0.039 | 0.772                |
| 90°                        | 0.140 $\pm$ 0.091 | 0.141 $\pm$ 0.094 | 0.829                | 0.036 $\pm$ 0.039 | 0.036 $\pm$ 0.047 | 0.668                |
| 120°                       | 0.144 $\pm$ 0.092 | 0.134 $\pm$ 0.091 | <0.001               | 0.032 $\pm$ 0.039 | 0.032 $\pm$ 0.038 | 0.633                |
| 150°                       | 0.157 $\pm$ 0.099 | 0.147 $\pm$ 0.093 | <0.001               | 0.042 $\pm$ 0.044 | 0.041 $\pm$ 0.048 | 0.409                |
| 180°                       | 0.200 $\pm$ 0.098 | 0.184 $\pm$ 0.092 | <0.001               | 0.066 $\pm$ 0.054 | 0.064 $\pm$ 0.055 | 0.293                |
| 210°                       | 0.211 $\pm$ 0.106 | 0.199 $\pm$ 0.087 | 0.005                | 0.074 $\pm$ 0.057 | 0.074 $\pm$ 0.058 | 0.836                |
| 240°                       | 0.171 $\pm$ 0.095 | 0.164 $\pm$ 0.088 | 0.020                | 0.049 $\pm$ 0.052 | 0.048 $\pm$ 0.050 | 0.501                |
| 270°                       | 0.170 $\pm$ 0.106 | 0.165 $\pm$ 0.094 | 0.214                | 0.046 $\pm$ 0.046 | 0.050 $\pm$ 0.052 | 0.031                |
| 300°                       | 0.191 $\pm$ 0.099 | 0.178 $\pm$ 0.090 | <0.001               | 0.063 $\pm$ 0.052 | 0.065 $\pm$ 0.055 | 0.601                |
| 330°                       | 0.218 $\pm$ 0.105 | 0.208 $\pm$ 0.095 | <0.001               | 0.084 $\pm$ 0.057 | 0.087 $\pm$ 0.057 | 0.167                |

AOD = angle opening distance; TISA = trabecular iris space area; SD = standard deviation; DLLSS = deep learning located scleral spur; MPSS = manual plotted scleral spur; PACD = primary angle-closure disease.

<sup>a</sup>independent t-test.
