# Supplementary material
Source: HighWire-hosted journal article supplement (https://bjo.bmj.com/content/107/6/802)
Supplement: inline-supplementary-material-7 [file inline-supplementary-material-7.pdf]

**Supplemental Table 2** Comparisons of MPSS-based parameters (mean  $\pm$  SD) between Dark1 and Dark2 dataset.

| AOD750 (mm)                |                   |                   |                      |                   |                   |                      |
|----------------------------|-------------------|-------------------|----------------------|-------------------|-------------------|----------------------|
| Angles                     | Normal            |                   |                      | PACD              |                   |                      |
|                            | DARK1             | DARK2             | P Value <sup>a</sup> | DARK1             | DARK2             | P Value <sup>a</sup> |
| Mean                       | 0.385 $\pm$ 0.193 | 0.386 $\pm$ 0.203 | <0.001               | 0.126 $\pm$ 0.079 | 0.134 $\pm$ 0.079 | 0.008                |
| 0°                         | 0.433 $\pm$ 0.242 | 0.440 $\pm$ 0.238 | 0.293                | 0.148 $\pm$ 0.093 | 0.153 $\pm$ 0.100 | 0.148                |
| 30°                        | 0.379 $\pm$ 0.201 | 0.382 $\pm$ 0.200 | 0.761                | 0.112 $\pm$ 0.086 | 0.120 $\pm$ 0.093 | 0.068                |
| 60°                        | 0.343 $\pm$ 0.200 | 0.349 $\pm$ 0.231 | 0.514                | 0.102 $\pm$ 0.079 | 0.106 $\pm$ 0.084 | 0.275                |
| 90°                        | 0.318 $\pm$ 0.196 | 0.345 $\pm$ 0.198 | <0.001               | 0.098 $\pm$ 0.082 | 0.103 $\pm$ 0.087 | 0.248                |
| 120°                       | 0.318 $\pm$ 0.193 | 0.334 $\pm$ 0.207 | 0.010                | 0.085 $\pm$ 0.078 | 0.082 $\pm$ 0.079 | 0.389                |
| 150°                       | 0.333 $\pm$ 0.193 | 0.348 $\pm$ 0.199 | 0.006                | 0.095 $\pm$ 0.080 | 0.101 $\pm$ 0.090 | 0.099                |
| 180°                       | 0.409 $\pm$ 0.196 | 0.427 $\pm$ 0.206 | 0.002                | 0.140 $\pm$ 0.104 | 0.148 $\pm$ 0.109 | 0.022                |
| 210°                       | 0.455 $\pm$ 0.232 | 0.473 $\pm$ 0.244 | 0.019                | 0.170 $\pm$ 0.111 | 0.180 $\pm$ 0.111 | 0.046                |
| 240°                       | 0.375 $\pm$ 0.185 | 0.392 $\pm$ 0.216 | 0.022                | 0.128 $\pm$ 0.104 | 0.132 $\pm$ 0.101 | 0.467                |
| 270°                       | 0.385 $\pm$ 0.228 | 0.393 $\pm$ 0.233 | 0.347                | 0.116 $\pm$ 0.105 | 0.131 $\pm$ 0.101 | 0.003                |
| 300°                       | 0.414 $\pm$ 0.204 | 0.415 $\pm$ 0.229 | 0.887                | 0.152 $\pm$ 0.103 | 0.145 $\pm$ 0.097 | 0.154                |
| 330°                       | 0.461 $\pm$ 0.230 | 0.462 $\pm$ 0.221 | 0.925                | 0.184 $\pm$ 0.109 | 0.188 $\pm$ 0.106 | 0.331                |
| TISA750 (mm <sup>2</sup> ) |                   |                   |                      |                   |                   |                      |
| Angles                     | Normal            |                   |                      | PACD              |                   |                      |
|                            | DARK1             | DARK2             | P Value <sup>a</sup> | DARK1             | DARK2             | P Value <sup>a</sup> |
| Mean                       | 0.176 $\pm$ 0.087 | 0.180 $\pm$ 0.096 | 0.013                | 0.056 $\pm$ 0.039 | 0.054 $\pm$ 0.038 | 0.064                |
| 0°                         | 0.203 $\pm$ 0.109 | 0.208 $\pm$ 0.111 | 0.088                | 0.076 $\pm$ 0.057 | 0.071 $\pm$ 0.057 | 0.035                |
| 30°                        | 0.176 $\pm$ 0.094 | 0.177 $\pm$ 0.103 | 0.786                | 0.051 $\pm$ 0.049 | 0.051 $\pm$ 0.051 | 0.998                |
| 60°                        | 0.147 $\pm$ 0.093 | 0.153 $\pm$ 0.117 | 0.150                | 0.035 $\pm$ 0.037 | 0.034 $\pm$ 0.035 | 0.433                |
| 90°                        | 0.135 $\pm$ 0.092 | 0.148 $\pm$ 0.100 | 0.002                | 0.037 $\pm$ 0.041 | 0.033 $\pm$ 0.039 | 0.076                |
| 120°                       | 0.140 $\pm$ 0.093 | 0.145 $\pm$ 0.103 | 0.144                | 0.034 $\pm$ 0.040 | 0.032 $\pm$ 0.040 | 0.152                |
| 150°                       | 0.152 $\pm$ 0.093 | 0.159 $\pm$ 0.101 | 0.029                | 0.043 $\pm$ 0.044 | 0.042 $\pm$ 0.050 | 0.569                |
| 180°                       | 0.196 $\pm$ 0.093 | 0.199 $\pm$ 0.102 | 0.283                | 0.065 $\pm$ 0.057 | 0.066 $\pm$ 0.057 | 0.584                |
| 210°                       | 0.208 $\pm$ 0.105 | 0.217 $\pm$ 0.108 | 0.030                | 0.078 $\pm$ 0.059 | 0.074 $\pm$ 0.057 | 0.159                |
| 240°                       | 0.170 $\pm$ 0.089 | 0.177 $\pm$ 0.107 | 0.082                | 0.052 $\pm$ 0.053 | 0.050 $\pm$ 0.048 | 0.426                |
| 270°                       | 0.171 $\pm$ 0.105 | 0.172 $\pm$ 0.107 | 0.847                | 0.043 $\pm$ 0.047 | 0.044 $\pm$ 0.046 | 0.791                |
| 300°                       | 0.191 $\pm$ 0.093 | 0.191 $\pm$ 0.106 | 0.893                | 0.068 $\pm$ 0.054 | 0.060 $\pm$ 0.051 | <0.001               |
| 330°                       | 0.217 $\pm$ 0.101 | 0.218 $\pm$ 0.105 | 0.834                | 0.089 $\pm$ 0.060 | 0.087 $\pm$ 0.059 | 0.446                |

AOD = angle opening distance; TISA = trabecular iris space area; SD = standard deviation; MPSS = manual plotted scleral spur; PACD = primary angle-closure disease.

<sup>a</sup>independent t-test.
