# Supplementary material
Source: HighWire-hosted journal article supplement (https://bjo.bmj.com/content/107/6/802)
Supplement: inline-supplementary-material-8 [file inline-supplementary-material-8.pdf]

**Supplemental Table 3** Scleral spur location difference between ResNet50 model and MPSS in DARK1 dataset with ResNet-50 model.

| Angle | ED All<br>(mean $\pm$ SD $\mu\text{m}$ )<br>(N=287) | ED Normal<br>(mean $\pm$ SD $\mu\text{m}$ )<br>(N=116) | ED PACD<br>(mean $\pm$ SD $\mu\text{m}$ )<br>(N=171) |
|-------|-----------------------------------------------------|--------------------------------------------------------|------------------------------------------------------|
| Mean  | 119.19 $\pm$ 89.58                                  | 108.68 $\pm$ 91.08                                     | 125.96 $\pm$ 87.94                                   |
| 0°    | 99.50 $\pm$ 75.08                                   | 92.57 $\pm$ 72.19                                      | 103.96 $\pm$ 76.69                                   |
| 30°   | 104.13 $\pm$ 76.42                                  | 83.56 $\pm$ 67.11                                      | 117.38 $\pm$ 79.19                                   |
| 60°   | 123.01 $\pm$ 92.81                                  | 118.35 $\pm$ 89.22                                     | 126.01 $\pm$ 95.11                                   |
| 90°   | 129.92 $\pm$ 85.07                                  | 111.16 $\pm$ 84.61                                     | 142.00 $\pm$ 83.32                                   |
| 120°  | 127.04 $\pm$ 82.77                                  | 113.17 $\pm$ 70.73                                     | 135.97 $\pm$ 88.67                                   |
| 150°  | 128.51 $\pm$ 89.33                                  | 123.22 $\pm$ 80.27                                     | 131.92 $\pm$ 94.70                                   |
| 180°  | 115.07 $\pm$ 79.69                                  | 105.81 $\pm$ 82.92                                     | 121.03 $\pm$ 77.13                                   |
| 210°  | 120.55 $\pm$ 94.83                                  | 95.92 $\pm$ 108.95                                     | 136.41 $\pm$ 80.85                                   |
| 240°  | 123.88 $\pm$ 100.33                                 | 111.01 $\pm$ 99.28                                     | 132.17 $\pm$ 100.33                                  |
| 270°  | 138.55 $\pm$ 112.65                                 | 124.99 $\pm$ 123.35                                    | 147.29 $\pm$ 104.51                                  |
| 300°  | 117.05 $\pm$ 99.00                                  | 112.45 $\pm$ 105.92                                    | 120.01 $\pm$ 94.38                                   |
| 330°  | 107.70 $\pm$ 94.01                                  | 108.73 $\pm$ 102.49                                    | 107.04 $\pm$ 88.32                                   |

ED = Euclidean distance; SD = standard deviation; N = number of subjects; MPSS = manual plotted scleral spur; PACD = primary angle-closure disease.
